# Supplementary material for: The role of SPI1-TYROBP-FCER1G network in oncogenesis and prognosis of osteosarcoma, and its association with immune infiltration
Source: Springer Nature journal article supplement (doi:10.1186/s12885-022-09216-w), 2022-01-25

Supplementary Figure 1.

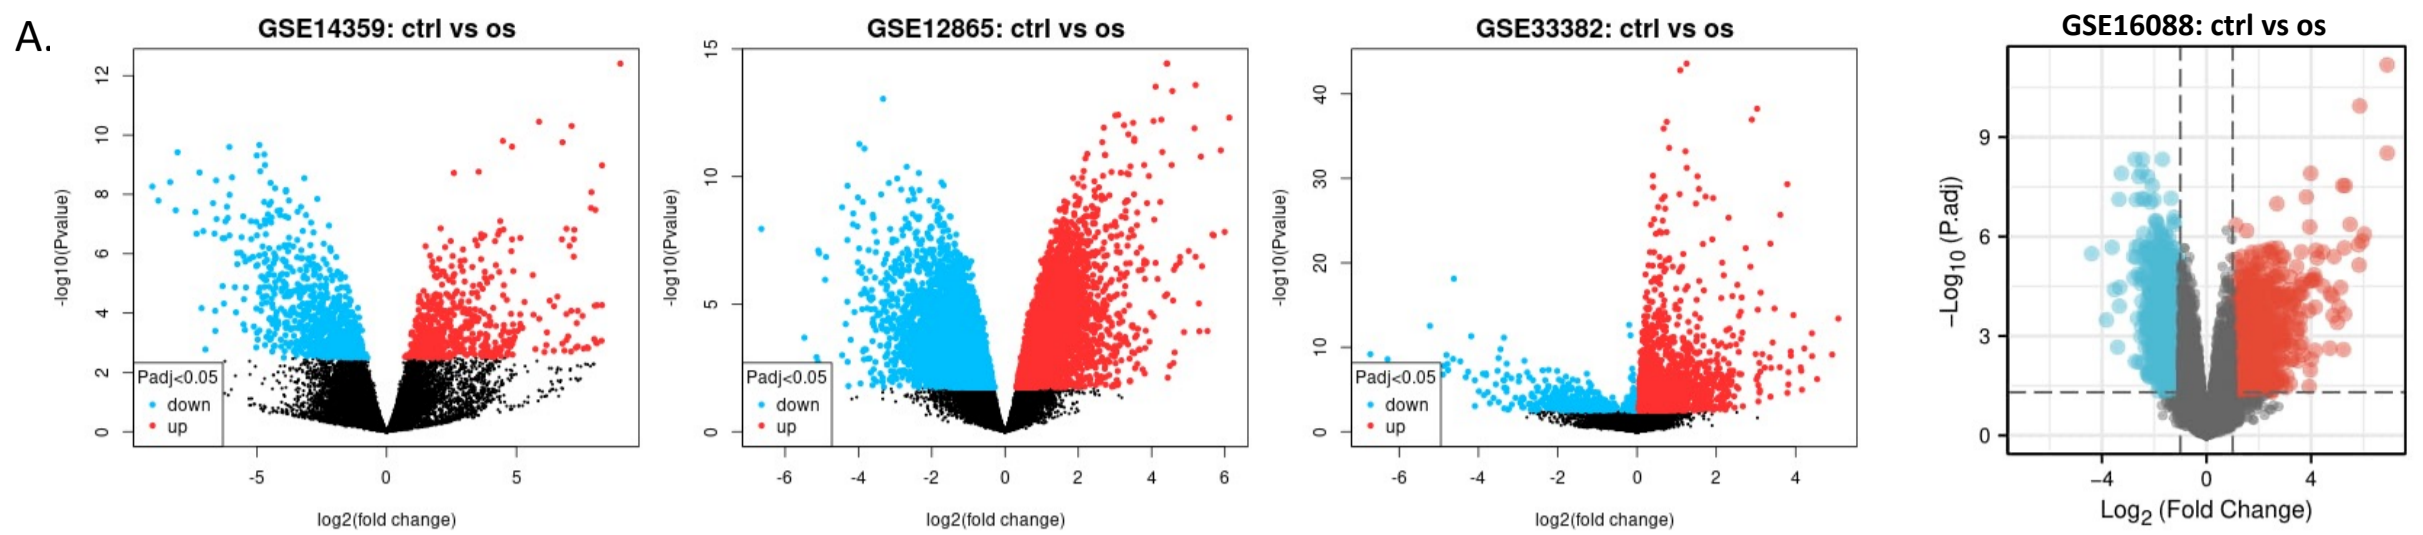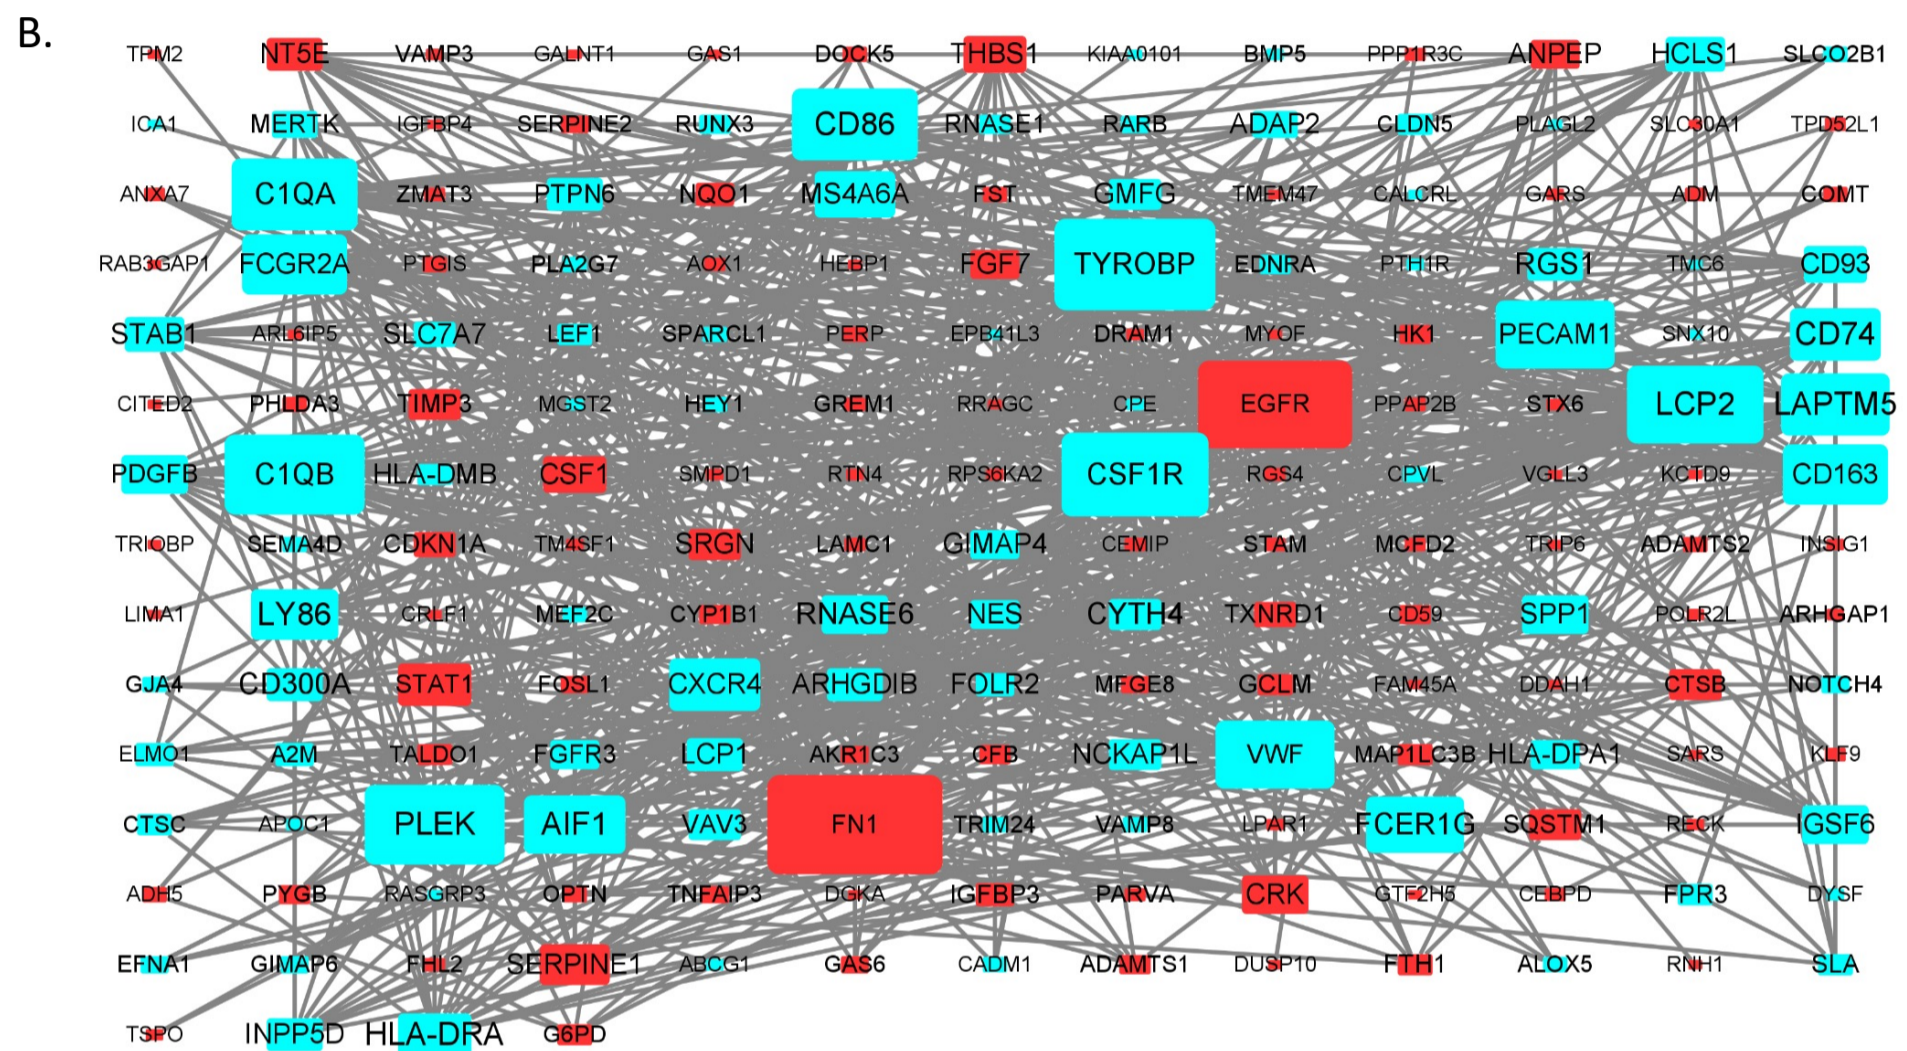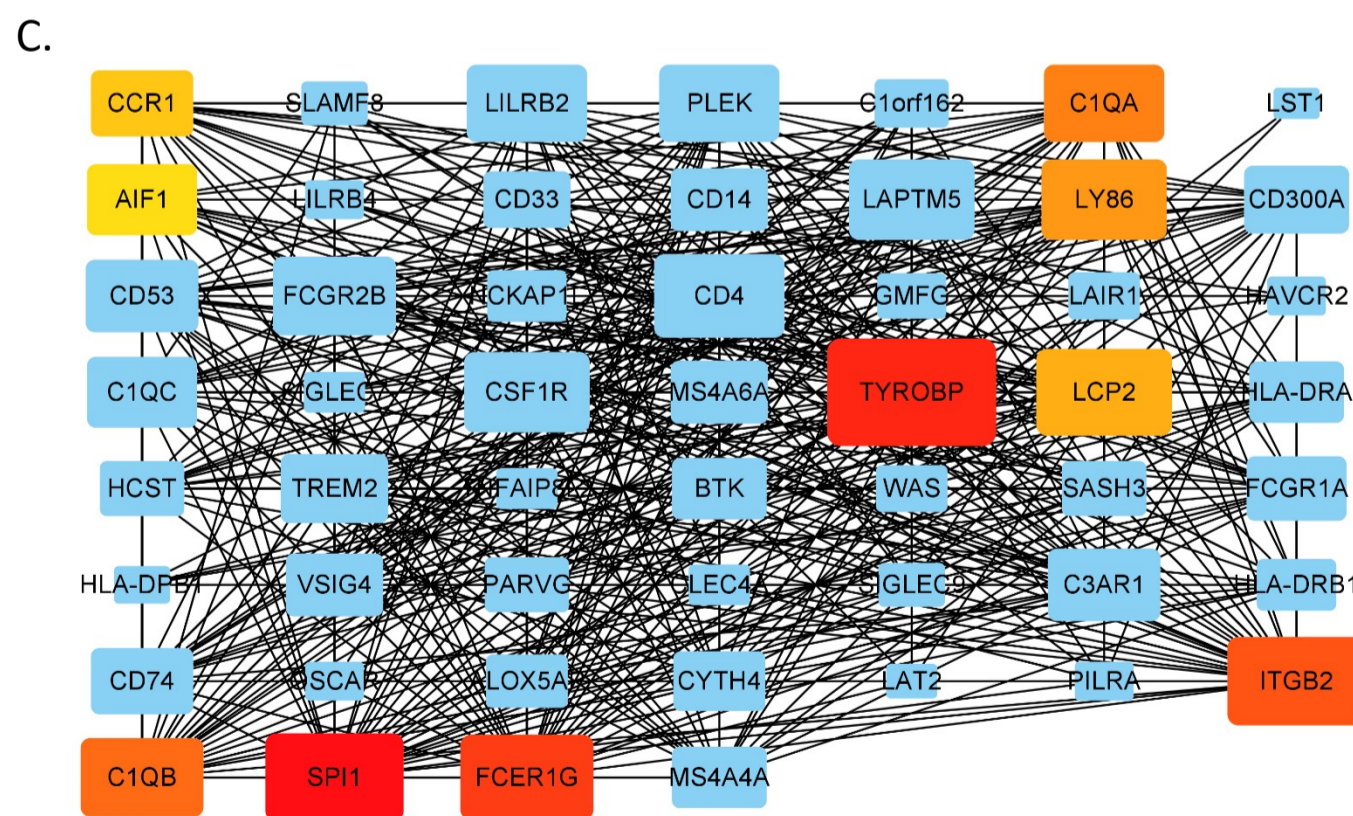

Supplement: MOESM1 [file 12885_2022_9216_MOESM1_ESM.pdf]
